# Supplementary material for: Highly sensitive enzyme-free amperometric sensing of hydrogen peroxide in real samples based on Co3O4nanocolumn structures
Source: Royal Society of Chemistry journal article supplement (doi:10.1039/c9ay00230h), 2019-01-01
Supplement: c9ay00230h1.pdf [file c9ay00230h1.pdf]

## Supporting information

### Highly sensitive enzyme-free amperometric sensing of hydrogen peroxide in real samples based on $\text{Co}_3\text{O}_4$ nanocolumn structures

Palanisamy Kannan,<sup>a\*</sup> Thandavarayan Maiyalagan,<sup>b</sup> Alagarsamy Pandikumar,<sup>c</sup> Longhua Guo,<sup>a,d\*</sup> Pitchaimani Veerakumar,<sup>e</sup> and Perumal Rameshkumar<sup>f</sup>

<sup>a</sup> College of Biological, Chemical Sciences and Engineering, Jiaying University, Jiaying, 314001, PR China.

<sup>b</sup> SRM Research Institute, Department of Chemistry, SRM University, Kattankulathur – 603203, Chennai, India.

<sup>c</sup> Electrochemical Materials Science and Functional Materials Division, CSIR-Central Electrochemical Research Institute, Karaikudi, 630003, India.

<sup>d</sup> Institute of Nanomedicine and Nanobiosensing; MOE Key laboratory for analytical science of food safety and biology; Fujian Provincial Key Laboratory of Analysis and Detection Technology for Food Safety; College of Chemistry, Fuzhou University, Fuzhou, 350116, PR China.

<sup>e</sup> Institute of Atomic and Molecular Sciences, Academia Sinica, Taipei, 10617 Taiwan.

<sup>f</sup> Department of Chemistry, Kalasalingam University (Kalasalingam Academy of Research and Education), Krishnankoil, India.

\* Corresponding Authors: [ktpkannan@mail.zjxu.edu.cn](mailto:ktpkannan@mail.zjxu.edu.cn) (Kannan); Tel: +86-19857386580; Fax: +86-573 83643264; [guolh@fzu.edu.cn](mailto:guolh@fzu.edu.cn) (Guo); Tel: +86 15280077696, Fax: +86 591 22866135.

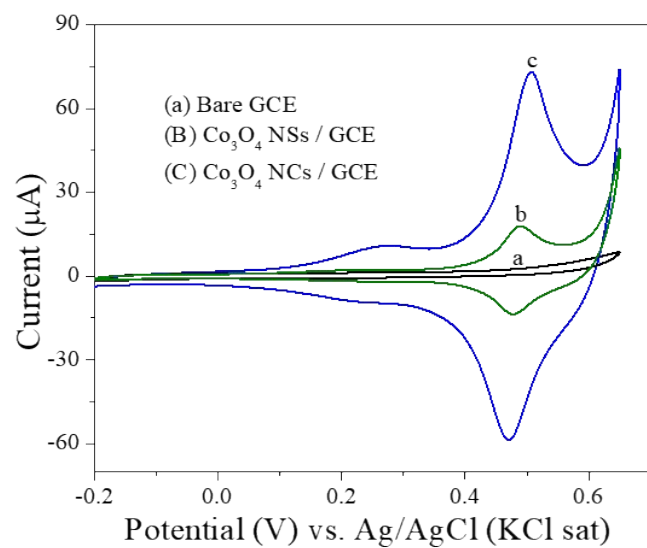

**Figure S1.** CVs obtained at bare GCE (a),  $\text{Co}_3\text{O}_4$  NSs GCE (b), and  $\text{Co}_3\text{O}_4$  NCs GCE (c) in Ar saturated 0.1 M NaOH aqueous solution at a scan rate of  $50 \text{ mV s}^{-1}$ .

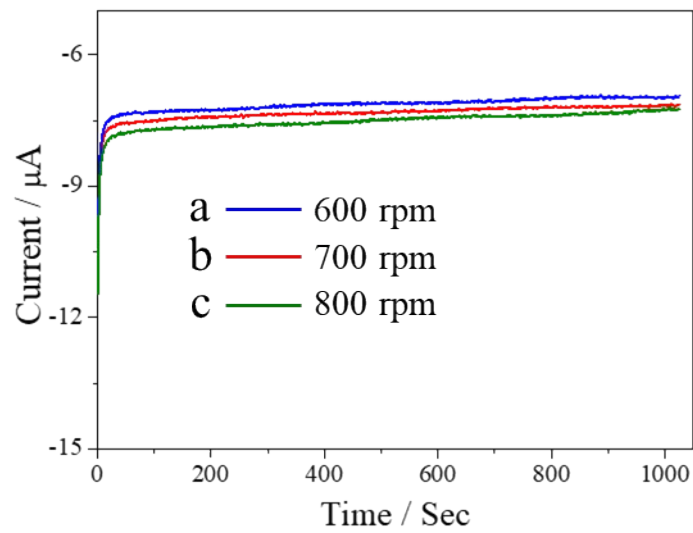

**Figure S2.** Optimization of stirring rate for amperometric detection of  $\text{H}_2\text{O}_2$  using  $\text{Co}_3\text{O}_4$  NCs / GCE in 0.1 M NaOH solution.

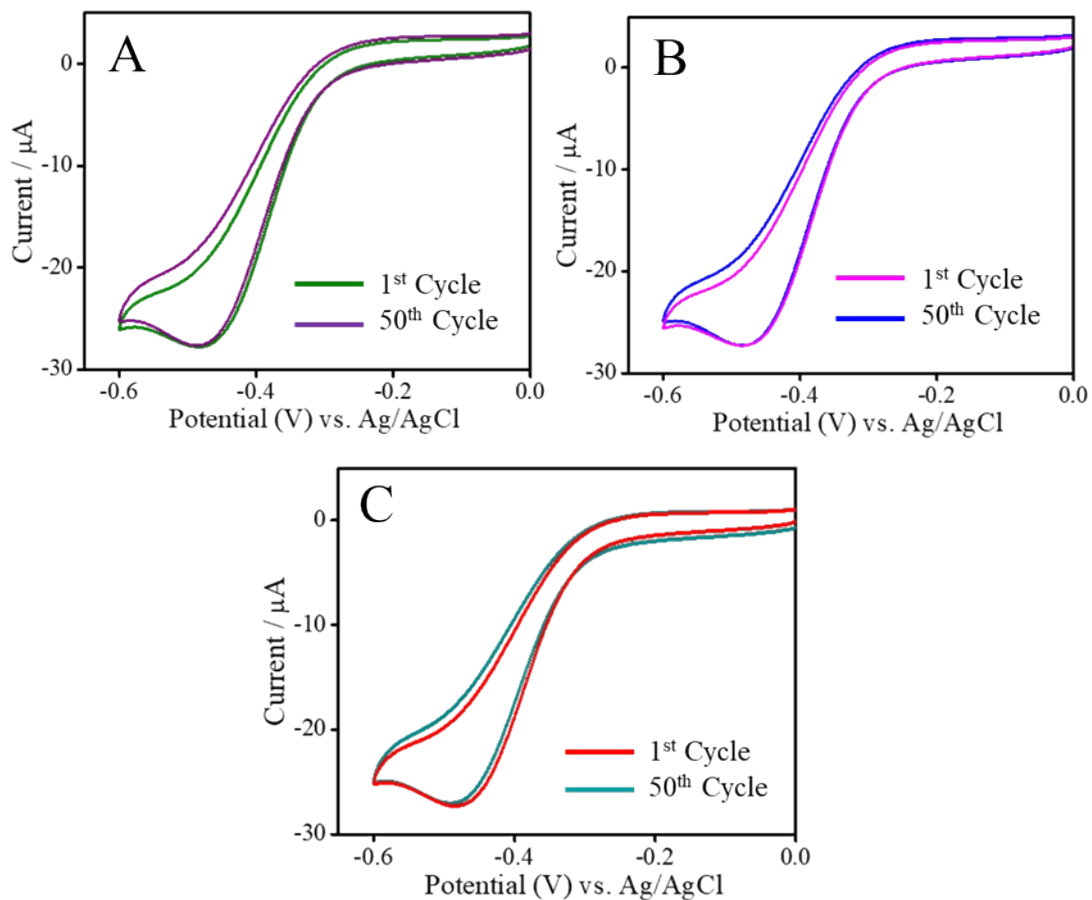

**Figure S3:** Reproducibility analysis of  $\text{H}_2\text{O}_2$  electroreduction at three-different batch  $\text{Co}_3\text{O}_4$  NCs electrodes.

**Table S1.** Comparison of the detection limit of the proposed non-enzymatic H<sub>2</sub>O<sub>2</sub> sensor vs. other Co<sub>3</sub>O<sub>4</sub> or Co<sub>3</sub>O<sub>4</sub> based composite nanomaterials.

| S. No     | Electrodes                                                                                     | Detection Techniques | Detection limit (μM) | References       |
|-----------|------------------------------------------------------------------------------------------------|----------------------|----------------------|------------------|
| 1         | Co <sub>3</sub> O <sub>4</sub> nanoparticles                                                   | Amperometry          | 4.40                 | [1]              |
| 2         | Vertically aligned Co <sub>3</sub> O <sub>4</sub> nanowalls                                    | Amperometry          | 2.80                 | [2]              |
| 3         | Co <sub>3</sub> O <sub>4</sub> nanoporous thin film                                            | Amperometry          | 200.0                | [3]              |
| 4         | Nafion/exfoliated graphene oxide–Co <sub>3</sub> O <sub>4</sub> nanocomposite                  | Amperometry          | 0.30                 | [4]              |
| 5         | Co <sub>3</sub> O <sub>4</sub> nanoparticles on mesoporous carbon nanofibers                   | Amperometry          | 0.50                 | [5]              |
| 6         | Co <sub>3</sub> O <sub>4</sub> nanoparticles and multi-walled carbon nanotubes                 | Amperometry          | 0.74                 | [6]              |
| 7         | Binary Mn-Co Oxides decorated graphene nanocomposites                                          | Amperometry          | 0.80                 | [7]              |
| 8         | Co <sub>3</sub> O <sub>4</sub> nanoparticles anchored to porous silicon                        | Amperometry          | 0.80                 | [8]              |
| 9         | Interconnected 1D Co <sub>3</sub> O <sub>4</sub> nanowires on reduced graphene oxide           | Amperometry          | 2.40                 | [9]              |
| 10        | Co <sub>3</sub> O <sub>4</sub> Nanoparticles anchored to multi-walled carbon nanotubes         | Amperometry          | 2.46                 | [10]             |
| 11        | Hexagonal CoAl-layered double hydroxide nanoshales/carbon nanotubes composite                  | Amperometry          | 10.0                 | [11]             |
| 12        | Co <sub>3</sub> O <sub>4</sub> nanoparticles anchored on nitrogen-doped reduced graphene oxide | Amperometry          | 100.0                | [12]             |
| 13        | CoFe <sub>2</sub> O <sub>4</sub> hollow nanostructures                                         | Amperometry          | 2.50                 | [13]             |
| <b>14</b> | <b>Co<sub>3</sub>O<sub>4</sub> nanocolumns arrays</b>                                          | <b>Amperometry</b>   | <b>0.28</b>          | <b>This work</b> |

**Table S2.** Determination of H<sub>2</sub>O<sub>2</sub> in 8: 2 ratio of river water + 0.1M NaOH and antiseptic solution + 0.1M NaOH based on the Co<sub>3</sub>O<sub>4</sub> NCs arrays electrode.

| River Water Sample | Added (mM) | Found (mM) | RSD (%) <sup>a</sup> | Recovery (%) |
|--------------------|------------|------------|----------------------|--------------|
| 1                  | 1          | 0.96       | 2.51                 | 96.00        |
| 2                  | 2          | 1.93       | 2.23                 | 96.50        |
| 3                  | 3          | 2.92       | 2.06                 | 97.33        |
| 4                  | 5          | 4.91       | 1.98                 | 98.20        |
| 5                  | 7          | 6.89       | 2.01                 | 98.42        |
|                    |            |            |                      |              |
| Antiseptic Sample  | Added (mM) | Found (mM) | RSD (%)              | Recovery (%) |
| 1                  | 1          | 0.97       | 2.63                 | 97.00        |
| 2                  | 2          | 1.88       | 2.91                 | 94.00        |
| 3                  | 3          | 2.81       | 3.06                 | 93.00        |
| 4                  | 5          | 4.74       | 2.84                 | 94.80        |
| 5                  | 7          | 6.68       | 2.72                 | 95.42        |

<sup>a</sup> Relative standard deviation was obtained from three independent measurements.

## References

- [1] J. Mu, L. Zhang, M. Zhao, Y. Wang, Co<sub>3</sub>O<sub>4</sub> nanoparticles as an efficient catalase mimic: Properties, mechanism and its electrocatalytic sensing application for hydrogen peroxide, *Journal of Molecular Catalysis A: Chemical*, 378, (2013) 30-37.
- [2] W. Jia, M. Guo, Z. Zheng, T. Yu, E.G. Rodriguez, Y. Wang, Y. Lei, Electrocatalytic oxidation and reduction of H<sub>2</sub>O<sub>2</sub> on vertically aligned Co<sub>3</sub>O<sub>4</sub> nanowalls electrode: Toward H<sub>2</sub>O<sub>2</sub> detection, *Journal of Electroanalytical Chemistry*, 625, (2009) 27-32.
- [3] G.S. Cao, R. Wang, P. Wang, X. Li, Y. Wang, G. Wang, J. Li, Electrochemical Co<sub>3</sub>O<sub>4</sub> nanoporous thin films sensor for hydrogen peroxide detection, *Nano*, 09, (2014) 1450047.
- [4] A.A. Ensafi, M. Jafari-Asl, B. Rezaei, (2013) A novel enzyme-free amperometric sensor for hydrogen peroxide based on Nafion/exfoliated graphene oxide-Co<sub>3</sub>O<sub>4</sub> nanocomposite, *Talanta*, 103, 322-329.
- [5] Y. Ni, Y. Liao, M. Zheng, S. Shao, In-situ growth of Co<sub>3</sub>O<sub>4</sub> nanoparticles on mesoporous carbon nanofibers: a new nanocomposite for nonenzymatic amperometric sensing of H<sub>2</sub>O<sub>2</sub>, *Microchimica Acta*, 184, (2017) 3689-3695.
- [6] C. Kaçar, B. Dalkiran, P.E. Erden, E. Kiliç, An amperometric hydrogen peroxide biosensor based on Co<sub>3</sub>O<sub>4</sub> nanoparticles and multiwalled carbon nanotube modified glassy carbon electrode, *Applied Surface Science*, 311, (2014) 139-146.
- [7] Su-Juan Li, Yun Xing, Hong-Yuan Yang, Jia-Yan Huang, Wen-Tian Wang, R.-T. Liu, Electrochemical Synthesis of a Binary Mn-Co Oxides Decorated Graphene Nanocomposites for Application in Nonenzymatic H<sub>2</sub>O<sub>2</sub> Sensing, *International Journal of Electrochemical Science*, 12, (2017) 6566-6576.
- [8] A. Farzad, F. Khalil, E. Habibollah, A.M. Mokhtari, M. Rahim, Cobalt nanoparticles anchored to porous silicon as a novel modifier for the construction of enzyme-free hydrogen peroxide screen-printed sensor, *Journal of the Chinese Chemical Society*, 65, (2018) 1082-1089.
- [9] L. Kong, Z. Ren, N. Zheng, S. Du, J. Wu, J. Tang, H. Fu, Interconnected 1D Co<sub>3</sub>O<sub>4</sub> nanowires on reduced graphene oxide for enzymeless H<sub>2</sub>O<sub>2</sub> detection, *Nano Research*, 8, (2015) 469-480.
- [10] H. Heli, J. Pishahang, (2014) Cobalt oxide nanoparticles anchored to multiwalled carbon nanotubes: Synthesis and application for enhanced electrocatalytic reaction and highly sensitive nonenzymatic detection of hydrogen peroxide, *Electrochimica Acta*, 123, 518-526.
- [11] H. Heli, J. Pishahang, H.B. Amiri, Synthesis of hexagonal CoAl-layered double hydroxide nanosheets/carbon nanotubes composite for the non-enzymatic detection of hydrogen peroxide, *Journal of Electroanalytical Chemistry*, 768, (2016) 134-144.
- [12] T. Zhang, C. He, F. Sun, Y. Ding, M. Wang, L. Peng, J. Wang, Y. Lin, Co<sub>3</sub>O<sub>4</sub> nanoparticles anchored on nitrogen-doped reduced graphene oxide as a multifunctional catalyst for H<sub>2</sub>O<sub>2</sub> reduction, oxygen reduction and evolution reaction, *Scientific Reports*, 7, (2017) 43638.
- [13] K. Vasuki, K. J. Babu, S. Sheet, G. Siva, A. R. Kim, D. J. Yoo, G. G. Kumar, Amperometric hydrogen peroxide sensor based on the use of CoFe<sub>2</sub>O<sub>4</sub> hollow nanostructures, *Microchimica Acta* 184 (2017)2579–2586.
